# Supplementary material for: Advanced electron microscopy characterization for pore structure of mesoporous materials; a study of FDU-16 and FDU-18
Source: Royal Society of Chemistry journal article supplement (doi:10.1039/c1jm11789k), 2011-01-01
Supplement: c1jm11789k.pdf [file c1jm11789k.pdf]

## Supporting Information for:

# Advanced electron microscopy characterization for pore structure of mesoporous materials; a study of FDU-16 and FDU-18

Miia Klingstedt,<sup>a</sup> Keiichi Miyasaka,<sup>\*b</sup> Kosuke Kimura,<sup>c</sup> Dong Gu,<sup>d</sup> Ying Wan,<sup>e</sup> Dongyuan Zhao<sup>d</sup> and Osamu Terasaki<sup>\*a,b</sup>

<sup>\*</sup> Correspondences: Keiichi Miyasaka, e-mail: [miyasakak@gmail.com](mailto:miyasakak@gmail.com), Osamu Terasaki, e-mail: [terasaki@kaist.ac.kr](mailto:terasaki@kaist.ac.kr)

<sup>a</sup> Department of Materials and Environmental Chemistry, Stockholm University, S-106 91, Stockholm, Sweden.

<sup>b</sup> Graduate School of EEWS (WCU), Korea Advanced Institute of Science and Technology, 335 Gwahangno, Yuseong-Gu, 305-701, Daejeon, Republic of Korea.

<sup>c</sup> Department of Applied Quantum Physics and Nuclear Engineering, Kyushu University, Nishi-ku, 819-0395, Fukuoka, Japan.

<sup>d</sup> Department of Chemistry, Fudan University, 200433, Shanghai, China.

<sup>e</sup> Department of Chemistry, Shanghai Normal University, 200433, Shanghai, China.

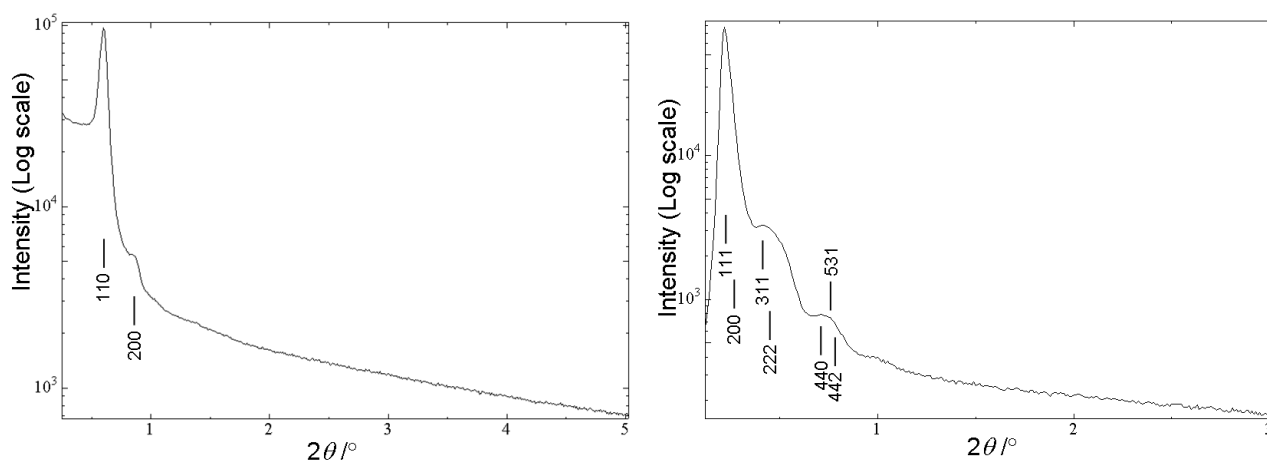

**Figure S1.** Powder X-ray diffraction (XRD) patterns of ordered mesoporous carbons FDU-16 (left) and FDU-18 (right). The observed reflections are indexed based on  $Im\bar{3}m$  for FDU-16 and  $Fm\bar{3}m$  for FDU-18, respectively. The cell parameters calculated from the highest peak positions are 13.5 nm for FDU-16 and 45.5 nm for FDU-18.

The XRD measurements were performed at BL02B2 in a synchrotron radiation facility SPring-8 (Japan) using a wavelength = 0.100 nm. The powder specimen was mounted in Lindemann glass capillary (diameter = 0.4 mm). The XRD profiles were recorded using an imaging plate set into a Debye-Scherrer type detector.

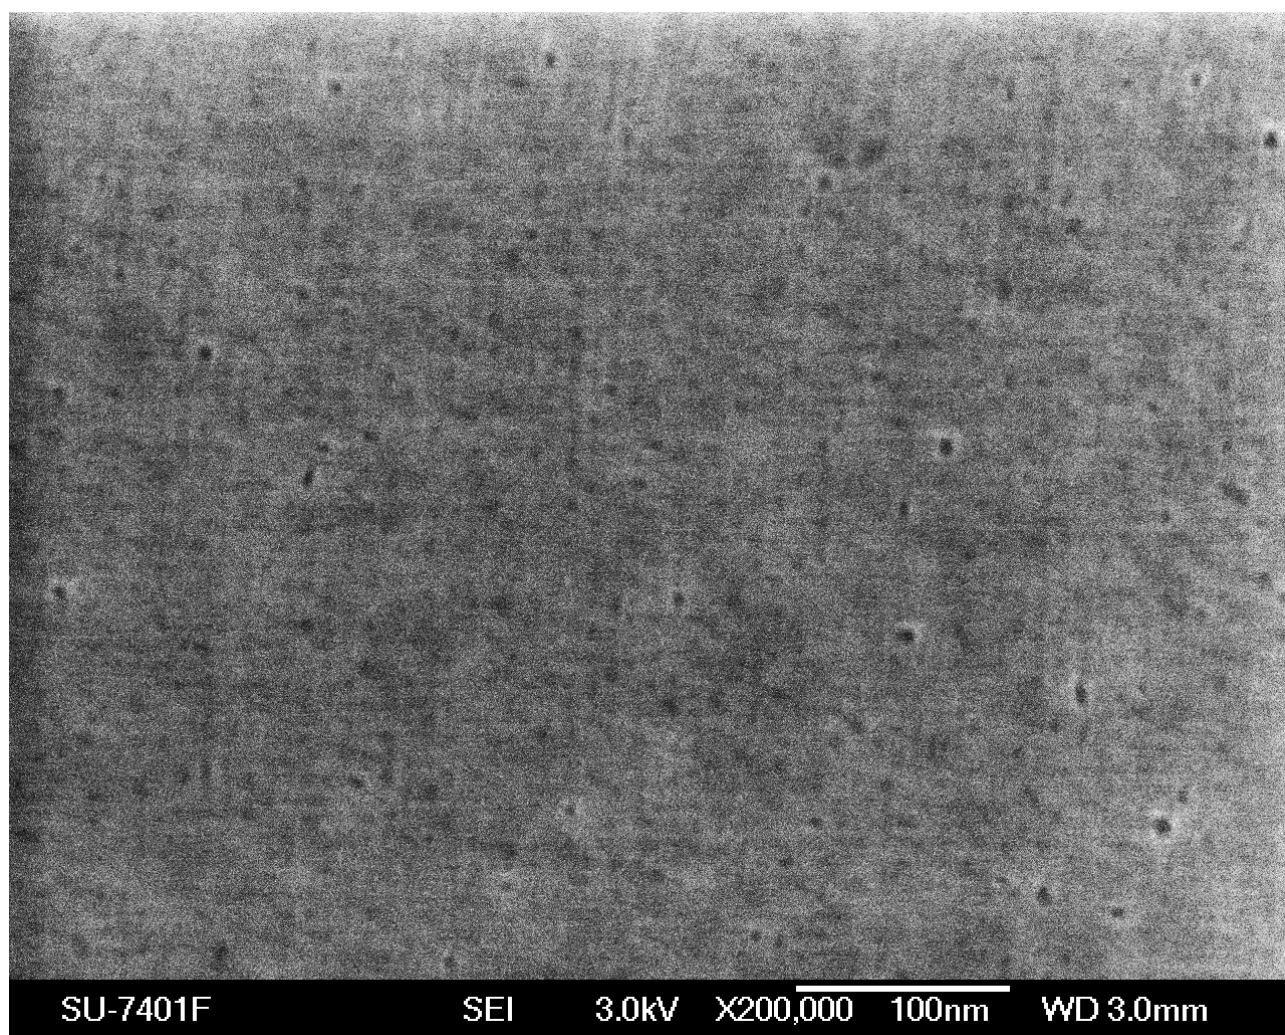

**Figure S2.** High resolution scanning electron microscopy (HRSEM) image of FDU-16 sample polished by a cross-section polisher (CP). This figure is an enlarged version of Fig. 5A.

A JEOL JSM-7401F was used for this HRSEM imaging. The sample powders were cross-sectioned by an Ar ion (JEOL SM-09010) with an accelerating voltage of 4 kV for 10 h and an emission of  $\sim 0.050$  mA. Afterward, the powders were mounted on the bottom side of a silica wafer with the Ar-beam first irradiating the Si-wafer.
